# Supplementary material for: DNA Compaction and Charge Neutralization Regulated by Divalent Ions in very Low pH Solution
Source: PubMed Central journal article supplement (PMC6419228; doi:10.3390/polym11020337), 2019-02-15
Supplement: polymers-11-00337-s001.pdf [file polymers-11-00337-s001.pdf]

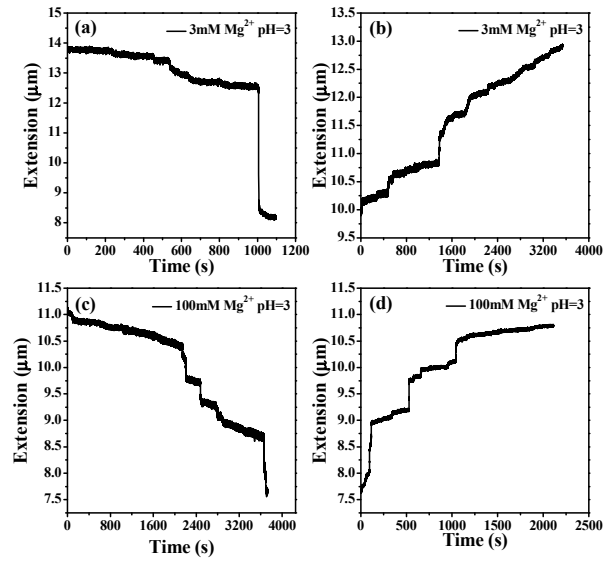

**Figure S1.** DNA extension-time curve measured by MT in DNA releasing and stretching process at different concentration of Mg<sup>2+</sup> in 10mM Tris. (a),(b):3mM Mg<sup>2+</sup>,pH=3.0. (c),(d):100mM Mg<sup>2+</sup>, pH=3.0.

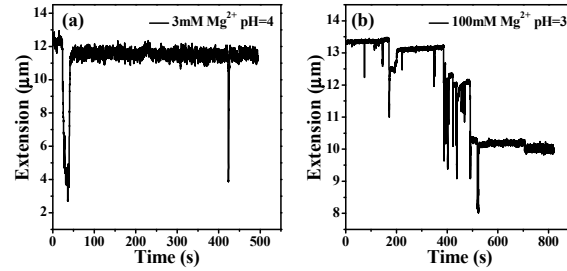

**Figure S2.** DNA extension-time curve measured by MT in DNA releasing and stretching process at different concentration of Mg<sup>2+</sup> and pH value.(a):3mM Mg<sup>2+</sup>, pH=4.0.(b):100mM Mg<sup>2+</sup>,pH=3.0.
